# Supplementary material for: A neutrophil cell membrane-biomimetic nanoplatform based on l-arginine nanoparticles for early osteoarthritis diagnosis and nitric oxide therapy
Source: Royal Society of Chemistry journal article supplement (doi:10.1039/d2nr02601e), 2022-01-01
Supplement: d2nr02601e1.pdf [file d2nr02601e1.pdf]

## Neutrophil Cell Membrane-Biomimetic Nanopatform Based on L-Arginine Nanoparticles for Early Osteoarthritis Diagnosis and Nitric Oxide Therapy

Qianqian Yu<sup>b\*,1</sup>, Yuqin Huang<sup>a,1</sup>, Xu Chen<sup>a</sup>, Yutong Chen<sup>a</sup>, Xufeng Zhu<sup>a</sup>, Yanan Liu<sup>a</sup>, and Jie Liu<sup>a\*</sup>

<sup>a</sup>College of Chemistry and Materials Science, Jinan University, Guangzhou, China

<sup>b</sup>South China Advanced Institute for Soft Matter Science and Technology, School of Molecular Science and Engineering, South China University of Technology, Guangzhou, China

\*Corresponding author. E-mail: tliuliu@jnu.edu.cn

<sup>1</sup>These authors contributed equally to the work.

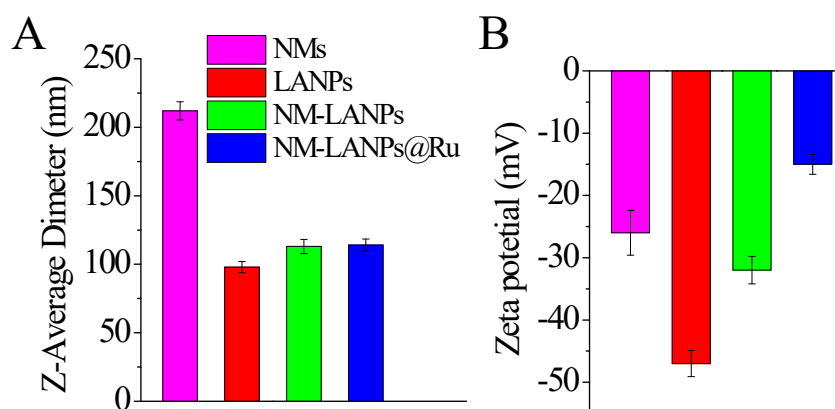

**Figure S1.** Z-average diameter (A), and zeta potentials (B) of different nanoparticles (LANPs, NM-LANPs, NM-LANPs@Ru) and neutrophil cell membrane in buffer measured by DLS.

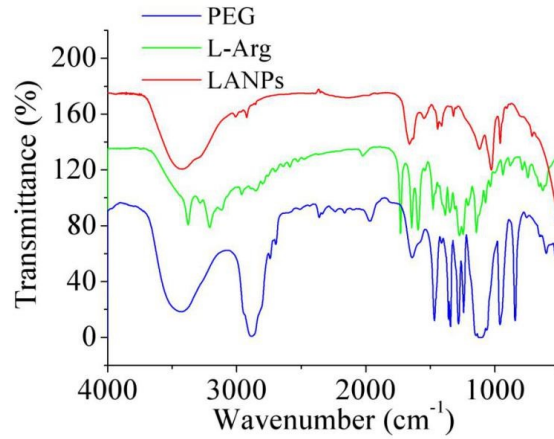

**Figure S2.** FTIR spectra of PEG, L-Arg and LANPs nanoparticles.

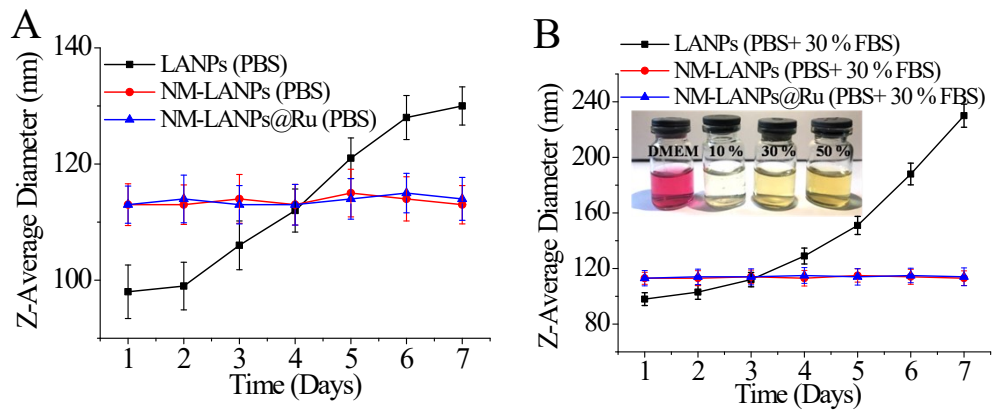

**Figure S3.** Stability of LANPs@Ru, and NM-LANPs@Ru in PBS with (A) and without serum (B) as monitored by dynamic light scattering every 24 h over a period of 7 days, Digital photo of collected NM-LANPs@Ru(bottom) and upper aqueous solution after centrifugation.

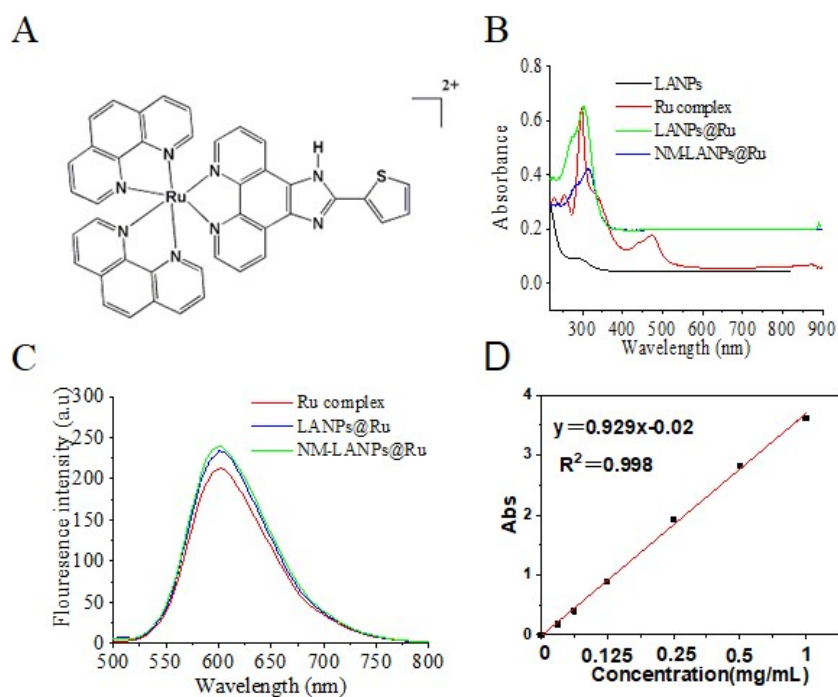

**Figure S4.** (A) The structure of the Ru complex. UV-visible spectra (B) and fluorescence spectra (C) of Ru complex, LANPs@Ru, and NM-LANPs@Ru. (D) Standard curve drawn from different concentrations of Ru complex.

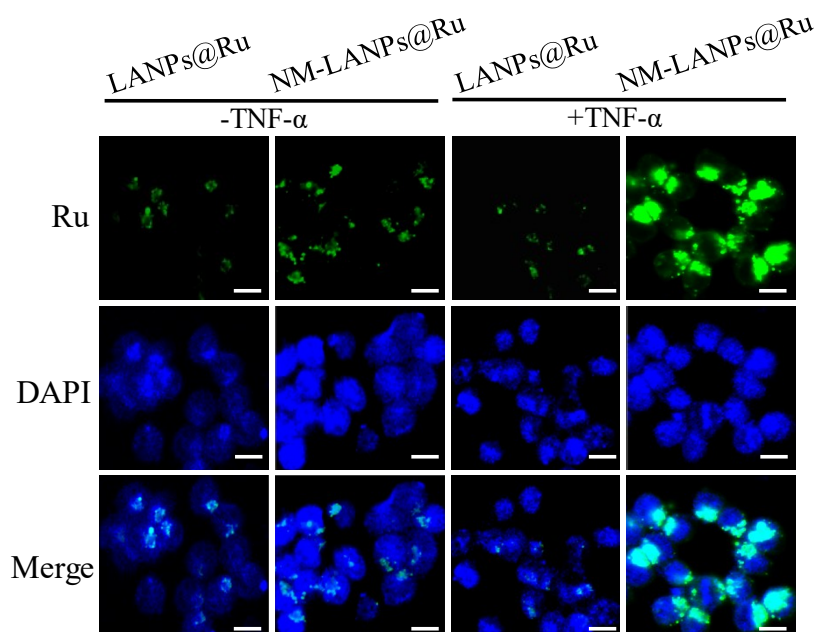

**Figure S5.** Confocal images of C28/I2 cells pretreated with or without TNF- $\alpha$  (3 ng/mL, for 12 h), respectively, followed by incubation with NM-LANPs@Ru or LANPs@Ru for 6 h, wherein the intensity represents the total integrated intensity of green fluorescence from ruthenium complex,

emitted at 560-615 nm; blue emission from Hoechst 33342 excited at 405 nm and emitted at 420-480 nm, the scale bar is 80  $\mu\text{m}$ .

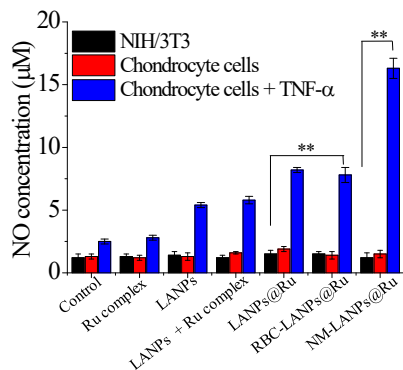

**Figure S6.** NO concentration after different nanoparticles treatment in NIH/3T3 cells and C28/I2 cell with or without TNF- $\alpha$  induced (\*\* $p < 0.01$ ).

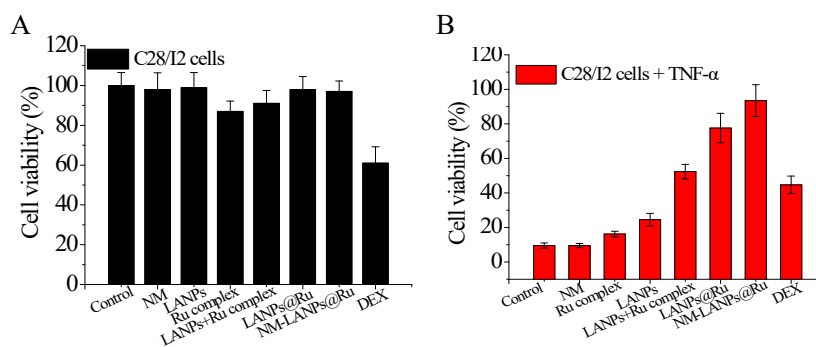

**Figure S7.** Cell viability of C28/I2 cells or TNF- $\alpha$ preincubate C28/I2 cells after incubation with different groups.

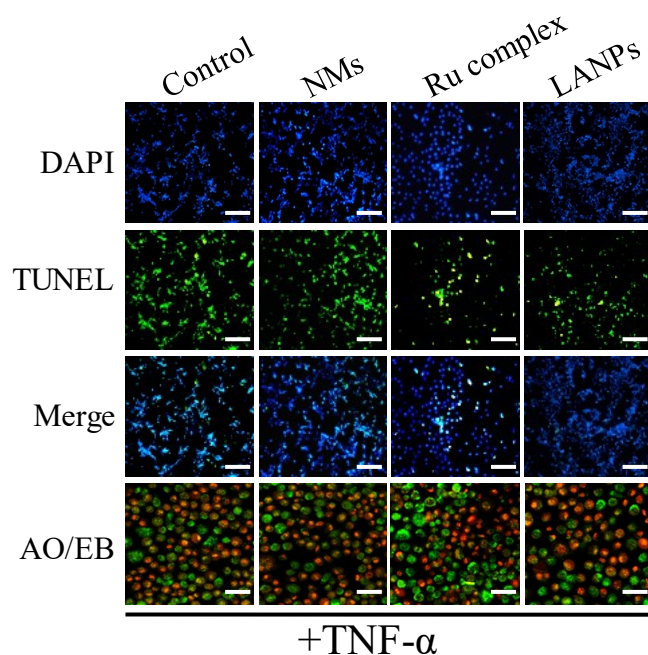

**Figure S8.** Confocal images of TUNEL of C28/I2 cells pretreated with TNF- $\alpha$  (3 ng/mL, for 12 h) followed by incubation with NMs, Ru complex or LANPs for 6 h, wherein the intensity represents the total integrated intensity of green fluorescence from TUNEL; blue emission from Hoechst 33342, the scale bar is 80  $\mu$ m.

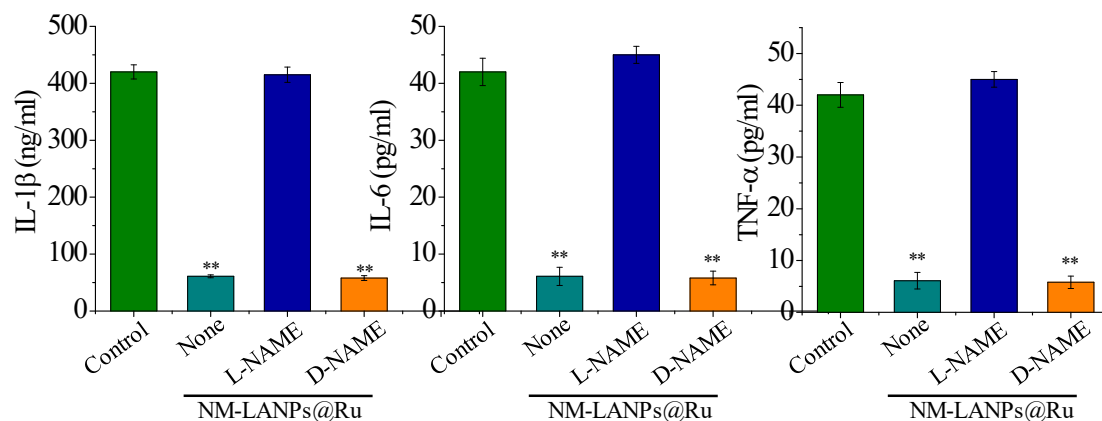

**Figure S9.** The effect of inflammatory factor IL-1, IL-6 and TNF- $\alpha$  after on day 2, when early arthritis was clearly established, mice were randomly divided into groups and given serial daily injections of targeted NPs without drug (Ctrl NP) or Fum-PD NP for three consecutive doses. In some groups, mice were given L-NAME or D-NAME (100 mg/kg) iv 30 min prior to the NP injection. On day 9 paws were harvested and homogenized, and paw lysates analyzed for cytokine levels (CG) by cytometric bead array (CBA) and ELISA.

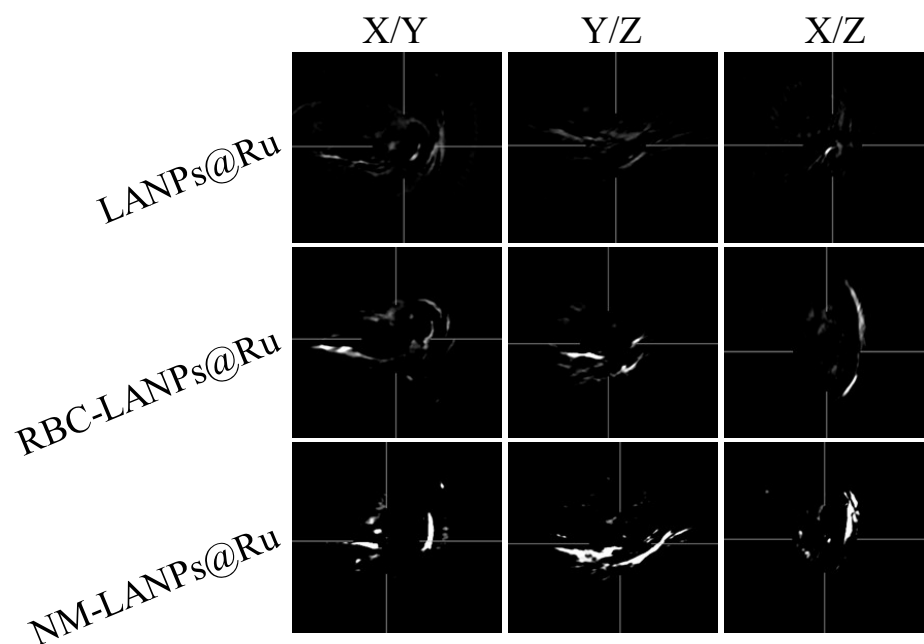

**Figure S10.** 3D PA imaging of OA in mice from three directions treated with LANPs@Ru, RBC-LANPs@Ru and NM-LANPs@Ru, respectively.

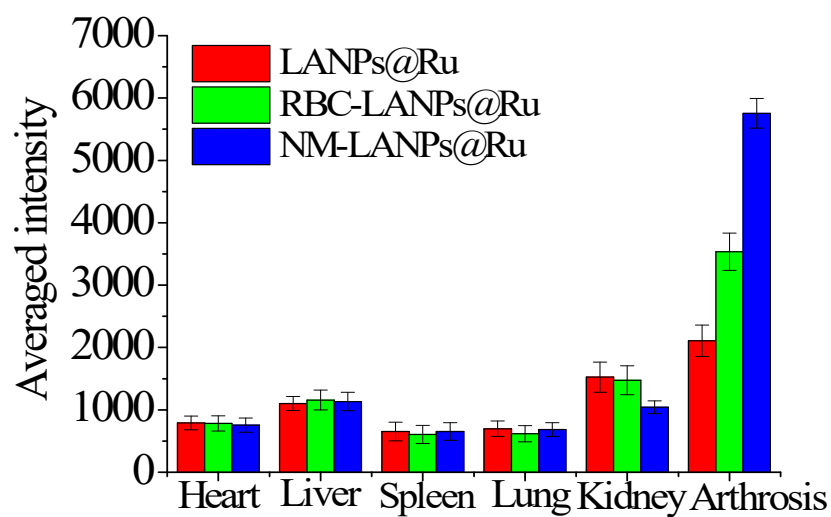

**Figure S11.** The mean fluorescent intensity of nanoparticles in the major organs and Knee osteoarthritis of KM mice after injected with different nanoparticles.

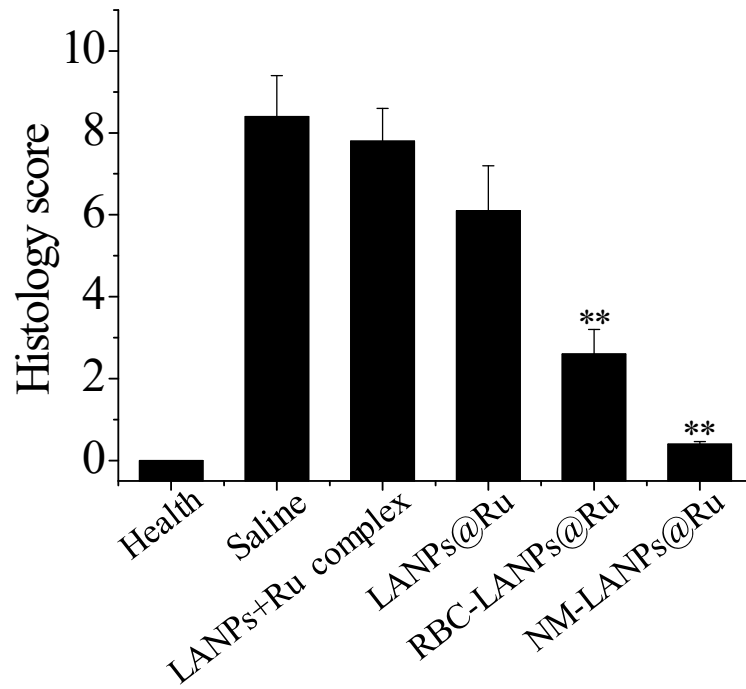

**Figure S12.** Histological histology scores of the knee joints different nanoparticles-treated OA.

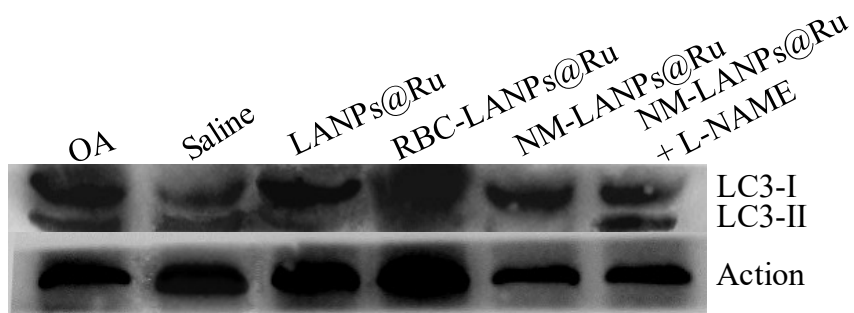

**Figure S13.** The expression of LC3-I and LC3-II in the OA from the different treatment groups with or without L-NAME treatment.
